# Supplementary material
Source: publisher figshare collection journal article supplement (https://acs.figshare.com/ndownloader/files/23763500)
Supplement: Supplementary file 1 [file 23763500]

No,SMILES,ATX_FS IC50 (nM),ATX_LPC IC50 (nM)
1,CC(C)[C@@H](NC(=O)c1cc(ccc1F)C(F)(F)F)C(=O)N1CCC2(CC1)N(C(=O)N(C)C2=O)c1ccc2[nH]ncc2c1,,55
2,CNC(=O)CN1CN(c2ccccc2)C2(CCN(CC2)C(=O)[C@H](NC(=O)c2cccc(c2F)C)C2CCCCC2)C1=O,2,86
3,O=C(C1=CC=CC(Cl)=C1)N[C@H](C2CCCCC2)C(N(CC3)CCC3(C4=O)N(C5=CC=CC=C5)CN4CC(NC)=O)=O,3.5,
4,O=C(C1=CC=CC=C1)N[C@H](C2CCCCC2)C(N(CC3)CCC3(C4=O)N(C5=CC=CC=C5)CN4CC(NC)=O)=O,350,
5,CN1CN(c2ccccc2)C2(CCN(CC2)C(=O)[C@H](NC(=O)c2cccc(c2F)C)C2CCCCC2)C1=O,1.6,56
6,CC(C)[C@@H](NC(=O)c1cccc(c1)F)C(=O)N1CCC2(CC1)N(CN(C)C2=O)c1ccccc1,2.2,
7,CC([C@H](C(N1CCC2(N(c3ccccc3)CN(C2=O)C)CC1)=O)NC(c4cc(C)ccc4)=O)C,2,
8,CN1CN(c2ccccc2)C2(CCN(CC2)C(=O)[C@H](NC(=O)c2cccc(c2)C)C2CCOCC2)C1=O,,623
9,CN1CN(c2ccccc2)C2(CCN(CC2)C(=O)[C@@H](NC(=O)c2cccc(c2)C)C2CCOCC2)C1=O,,"10,000"
10,CC(C)[C@H](NC(=O)c1cc(ccc1F)C(F)(F)F)C(=O)N1CCC2(CC1)N(C(=O)N(C)C2=O)c1ccc2[nH]ncc2c1,,"10,000"
11,CN1CN(C2CC2)C2(CCN(CC2)C(=O)[C@H](NC(=O)c2cccc(c2F)C)C2CCCCC2)C1=O,,819
12,CN1CN(c2ccccn2)C2(CCN(CC2)C(=O)[C@H](NC(=O)c2cccc(c2)C)C2CCCCC2)C1=O,,905
13,CC(C)[C@@H](NC(=O)c1cccc(c1F)C)C(=O)N1CCC2(CC1)N(C(=O)N(C)C2=O)c1ccccc1,,683
14,CC(C)[C@@H](NC(=O)c1cccc(c1)C(F)(F)F)C(=O)N1CCC2(CC1)N(C(=O)N(C)C2=O)c1ccc2[nH]ncc2c1,,340
15,CC(C)[C@@H](NC(=O)c1cc(ccc1C)C(F)(F)F)C(=O)N1CCC2(CC1)N(C(=O)N(C)C2=O)c1ccc2[nH]ncc2c1,,4900
16,CC(C)[C@@H](NC(=O)c1cc(ccc1Cl)C(F)(F)F)C(=O)N1CCC2(CC1)N(C(=O)N(C)C2=O)c1ccc2[nH]ncc2c1,,1470
17,CN1C(=O)N(c2ccc3[nH]ncc3c2)C2(CCN(CC2)C(=O)[C@H](NC(=O)c2cc(ccc2F)C(F)(F)F)C2CCCC2)C1=O,,34
18,CN1C(=O)N(c2ccc3[nH]ncc3c2)C2(CCN(CC2)C(=O)CNC(=O)c2cc(ccc2F)C(F)(F)F)C1=O,,"10,000"
19,CC(C)[C@@H](NC(=O)c1cc(ccc1F)C(F)(F)F)C(=O)N1CCC2(CC1)N(CN(C)C2=O)c1ccc2[nH]ncc2c1,,13.4
20,CC(C)[C@@H](NC(=O)c1cc(ccc1F)C(F)(F)F)C(=O)N1CCC2(CC1)N(C(=O)N(C)C2=O)c1ccccc1,,100
21,CC(C)[C@@H](NC(=O)c1cc(ccc1F)C(F)(F)F)C(=O)N1CCC2(CC1)N(C(=O)N(C)C2=O)c1ccc(cc1)C(=O)O,,31
22,CC(C)[C@@H](NC(=O)c1cc(ccc1F)C(F)(F)F)C(=O)N1CCC2(CC1)N(C(=O)N(C)C2=O)c1ccc(cc1)C,,38
23,CC(C)[C@@H](NC(=O)c1cc(ccc1F)C(F)(F)F)C(=O)N1CCC2(CC1)N(C(=O)N(C)C2=O)c1cccc(c1)Cl,,46
